# Supplementary material for: Anticancer and Differentiation Properties of the Nitric Oxide Derivative of Lopinavir in Human Glioblastoma Cells
Source: PubMed Central journal article supplement (PMC6222694; doi:10.3390/molecules23102463), 2018-09-26
Supplement: molecules-23-02463-s001.pdf [file molecules-23-02463-s001.pdf]

# Anticancer and differentiation properties of the nitric-oxide derivative of the HIV protease inhibitor Lopinavir in human glioblastoma cells

Maria Sofia Basile <sup>1,2</sup>, Emanuela Mazzon <sup>3</sup>, Tamara Krajnovic <sup>1</sup>, Dijana Draca <sup>1</sup>, Eugenio Cavalli <sup>3</sup>, Yousef Al-Abed <sup>4</sup>, Placido Bramanti <sup>3</sup>, Ferdinando Nicoletti <sup>2,\*</sup>, Sanja Mijatovic <sup>1</sup> and Danijela Maksimovic-Ivanic <sup>1</sup>

<sup>1</sup> Department of Immunology, Institute for Biological Research "Sinisa Stankovic", Belgrade University, Bulevar despota Stefana 142, 11060 Belgrade; Serbia; sofiabasile@hotmail.it; tamara\_krajnovic@yahoo.com; dracadiana@gmail.com; sanjamama@yahoo.com; nelamax@yahoo.com

<sup>2</sup> Department of Biomedical and Biotechnological Sciences, University of Catania, Via S. Sofia 89, 95123 Catania, Italy; sofiabasile@hotmail.it

<sup>3</sup> IRCCS Centro Neurolesi Bonino Pulejo, Strada Statale 113, C.da Casazza, 98124 Messina, Italy; emanuela.mazzon@ircsme.it; eugeniocavalli9@hotmail.it; placido.bramanti@ircsme.it

<sup>4</sup> Center for Molecular Innovation, The Feinstein Institute for Medical Research, 350 Community drive, Manhasset, NY, 11030, USA; yalabel@northwell.edu

\* Correspondence: E-mail address: ferdinic@unict.it; Tel.: +390954781270

Received: 31 August 2018; Accepted: date; Published: date

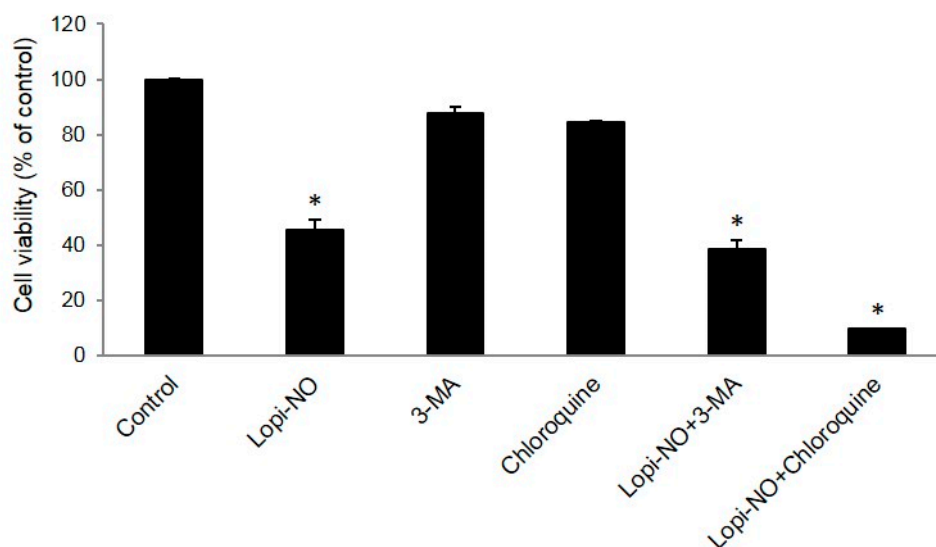

**Figure S1.** Cytoprotective role of autophagy in Lopinavir treated LN-229 cells. Cells were treated with IC<sub>50</sub> value of Lopinavir in the presence of autophagy inhibitor 3-MA (1 mM) or chloroquine (20  $\mu$ M) for 48 h and cellular viability by MTT test was estimated. \*  $p < 0.05$  compared to untreated cultures.

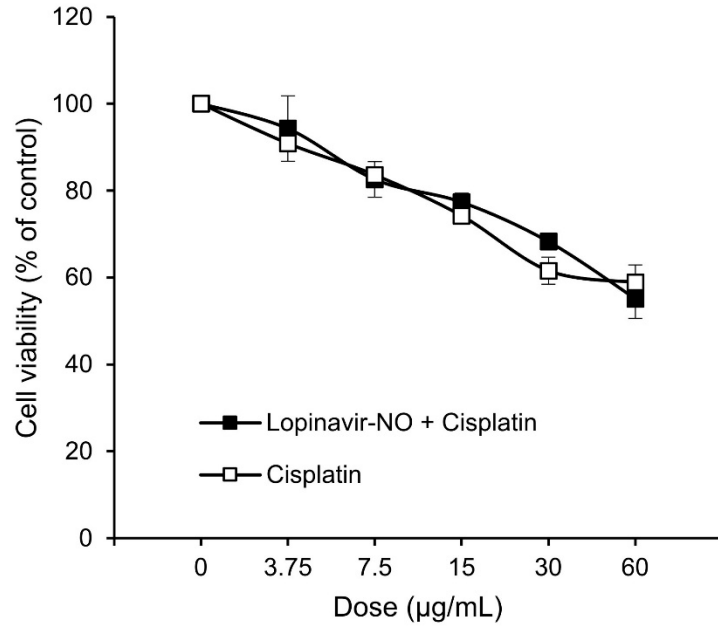

**Figure S2.** Interplay between Lopi-NO and cisplatin on U-251 cells. Cells were exposed to cisplatin in the presence of IC<sub>50</sub> value of Lopi-NO and cellular viability was measured by CV test.
